# Supplementary material
Source: Springer Nature journal article supplement (https://www.springermedizin.de/resource/supplementary/12943_2014_1443_MOESM1_ESM.pdf/9553026)
Supplement: MOESM1 [file 9553026]

The level of HE4 secretion prior and post stable over expression

Score according to OD450 values minus blank as follows: ++, >0.5; +, 0.1–0.5; (+), 0.05–0.1; –, <0.05

| <b>Cell lines</b> | <b>CaoV-3</b> | <b>CaoV-3-Mock</b> | <b>CaoV-3-H</b> | <b>CaoV-3-L</b> |
|-------------------|---------------|--------------------|-----------------|-----------------|
| HE4               | +             | +                  | ++              | -               |

CaoV-3-H: HE4 high expression in CaoV-3 cell lines

CaoV-3-L: HE4 low expression in CaoV-3 cell lines
